# Supplementary material for: Impact of chlorine ion chemistry on ozone loss in the middle atmosphere during very large solar proton events
Source: Copernicus journal article supplement (doi:10.5194/acp-23-12985-2023), 2023-10-16
Supplement: Supplementary file 1 [file acp-23-12985-2023-supplement.pdf]

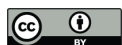

*Supplement of*

## **Impact of chlorine ion chemistry on ozone loss in the middle atmosphere during very large solar proton events**

**Monali Borthakur et al.**

*Correspondence to:* Monali Borthakur ([monali.borthakur@kit.edu](mailto:monali.borthakur@kit.edu))

The copyright of individual parts of the supplement might differ from the article licence.

## Supplement

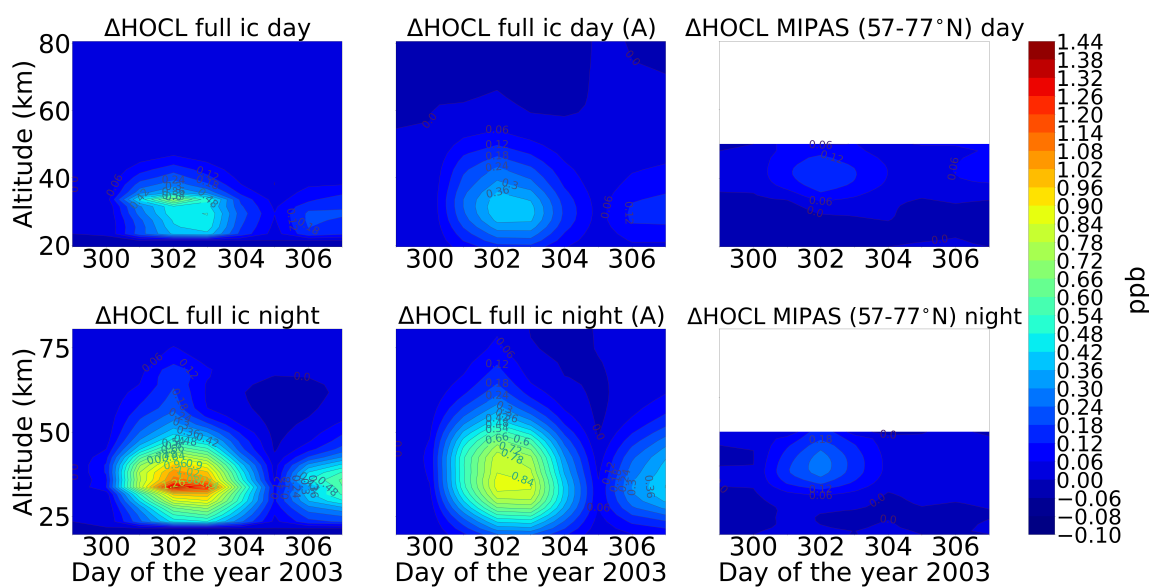

**Figure S1.** Absolute differences of HOCl full ion-chemistry w.r.t. 26<sup>th</sup> October for day-time (sza  $\leq 90^\circ$ ) and night-time (sza  $> 98^\circ$ ). Column-wise: Full ion-chemistry, full ion-chemistry (with Averaging kernel) and MIPAS 57-77°N zonal averages.



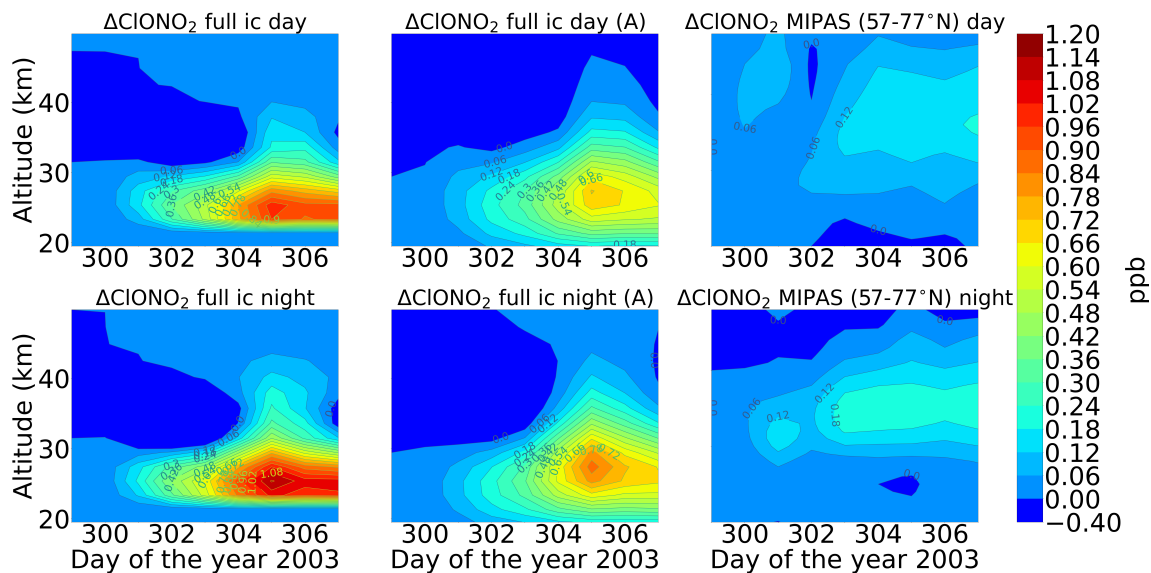

**Figure S2.** Same as figure S1 but for  $\text{CIONO}_2$

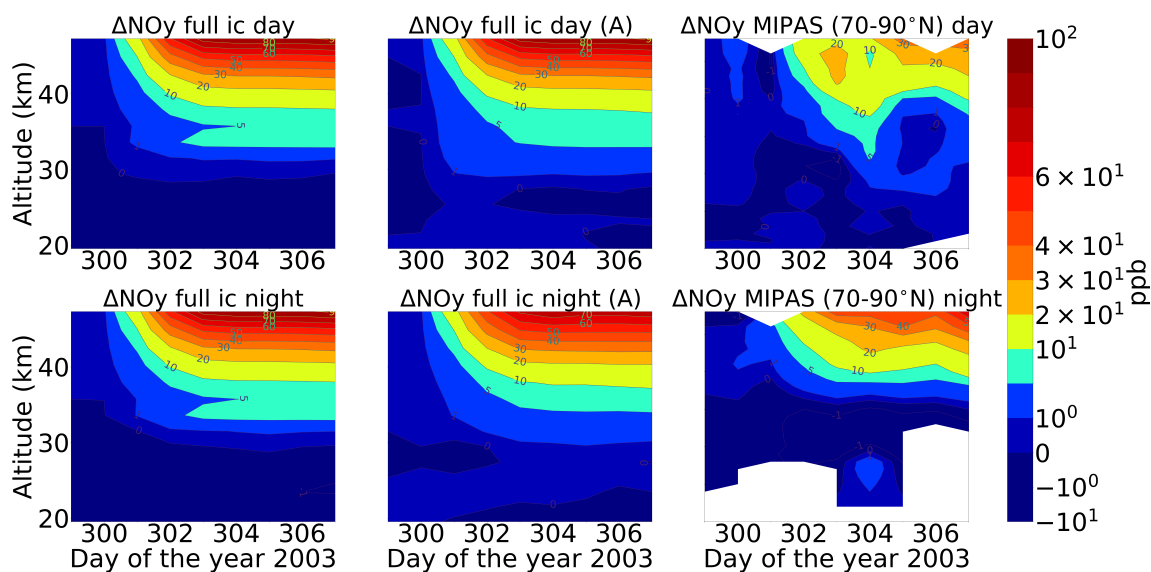

**Figure S3.** Same as figure S1 but for  $\text{NO}_y$

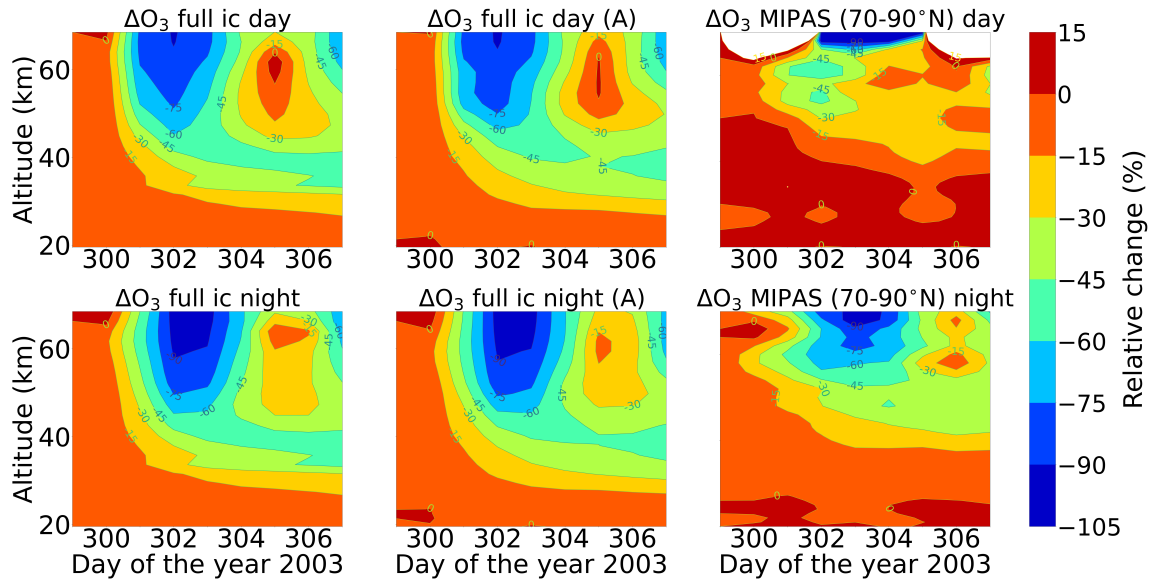

**Figure S4.** Relative differences of  $O_3$  w.r.t. 26<sup>th</sup> October. Rest is the same as figure S1

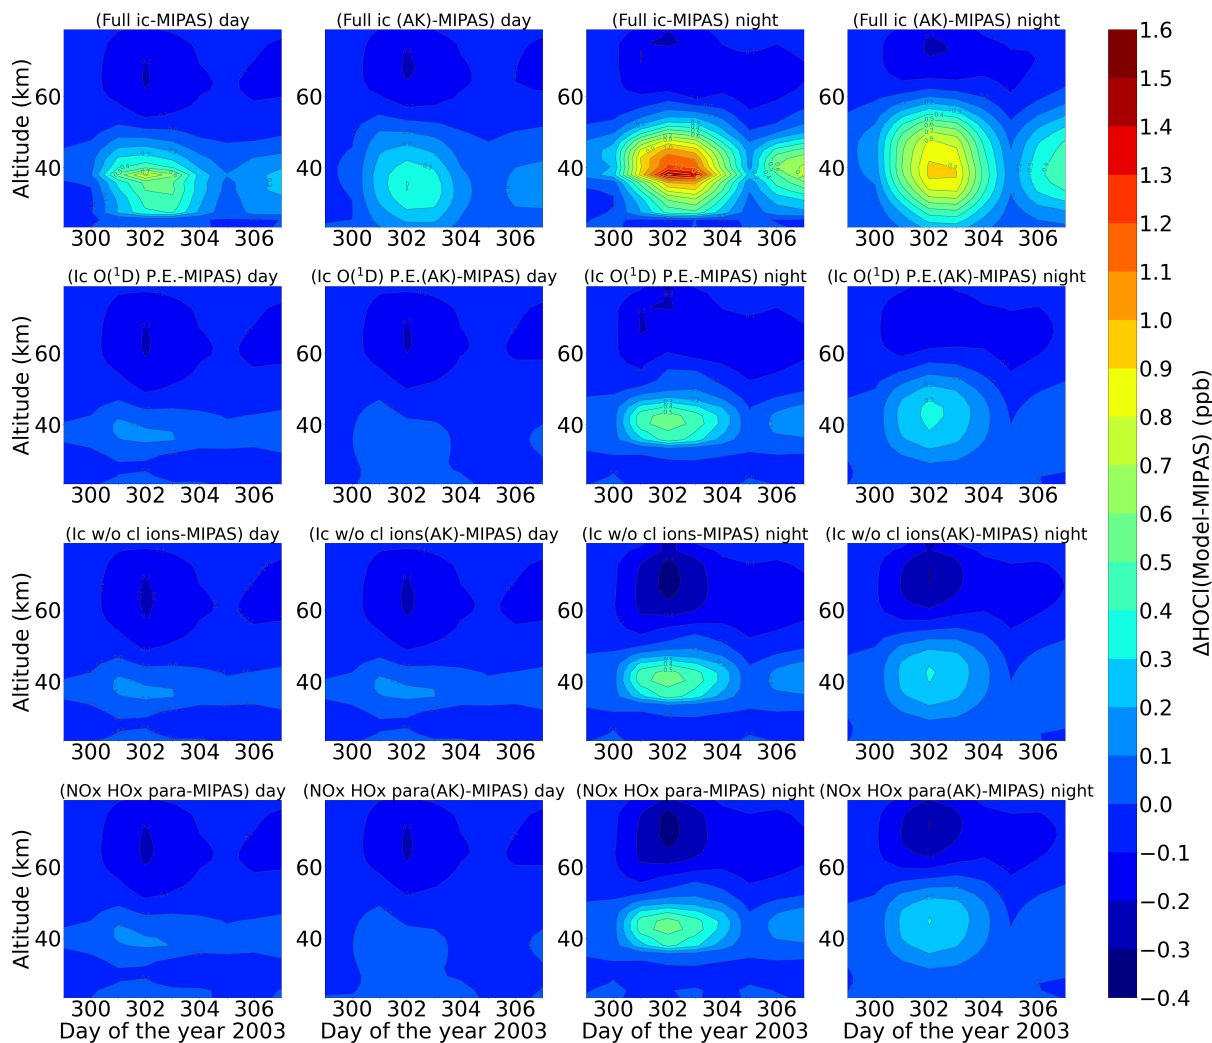

**Figure S5.** (Model-MIPAS) for day-time ( $\text{sza} \leq 90^\circ$ ) and night-time ( $\text{sza} > 98^\circ$ ). Row-wise: Differences w.r.t. MIPAS zonal averages for: Full ion-chemistry, full ion-chemistry with  $\text{O}(^1\text{D})$  in photo-chemical equilibrium, sensitivity tests without chlorine ion-chemistry and parameterised  $\text{NO}_x$  and  $\text{HO}_x$  model. Column-wise: Daytime, daytime (model with averaging kernel applied), nighttime, nighttime (model with averaging kernel applied).

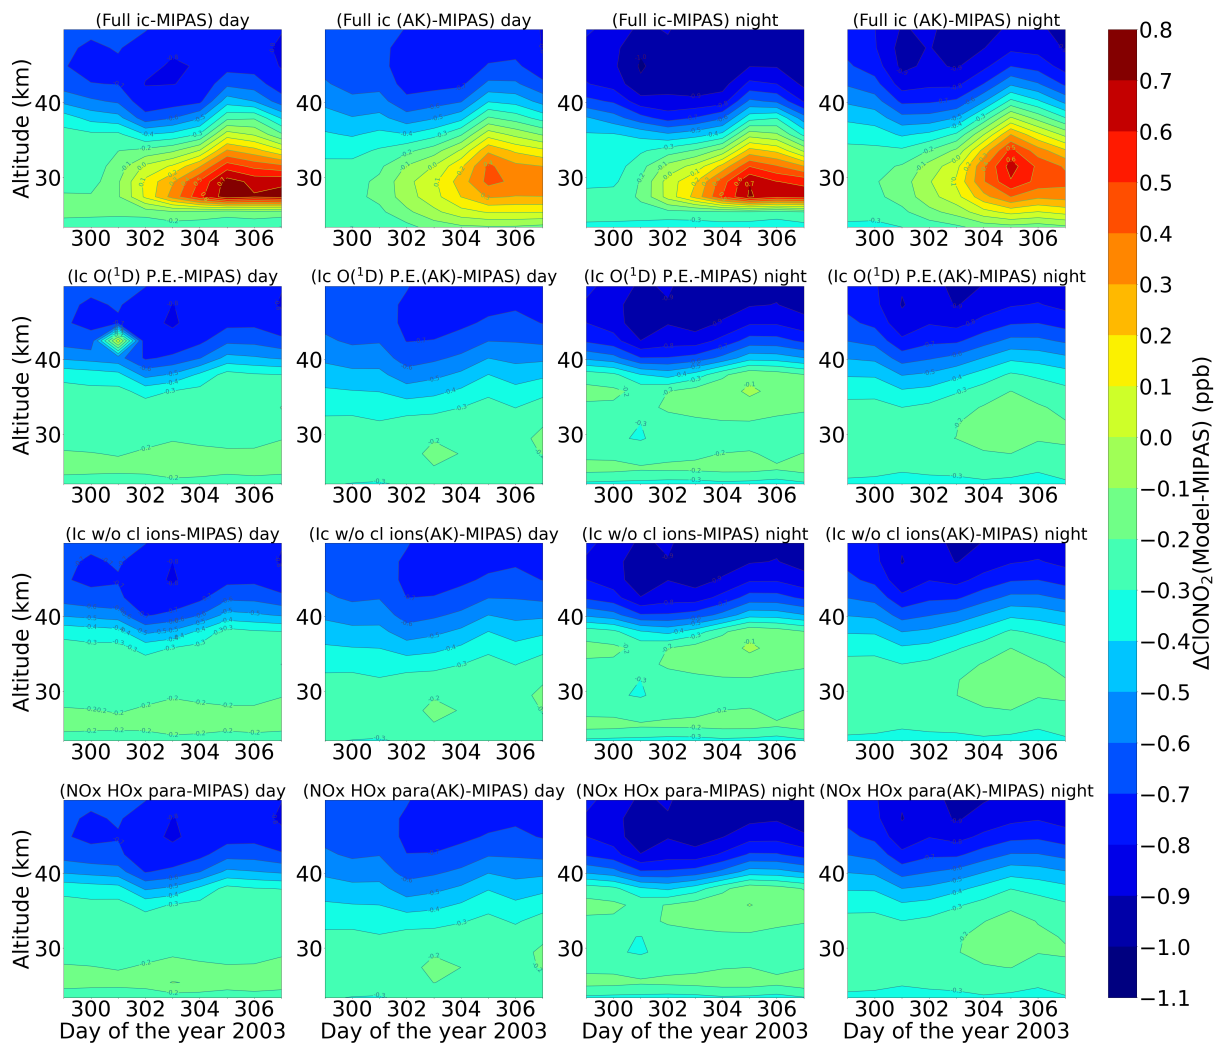

**Figure S6.** Same as figure S5 but for  $\text{ClONO}_2$

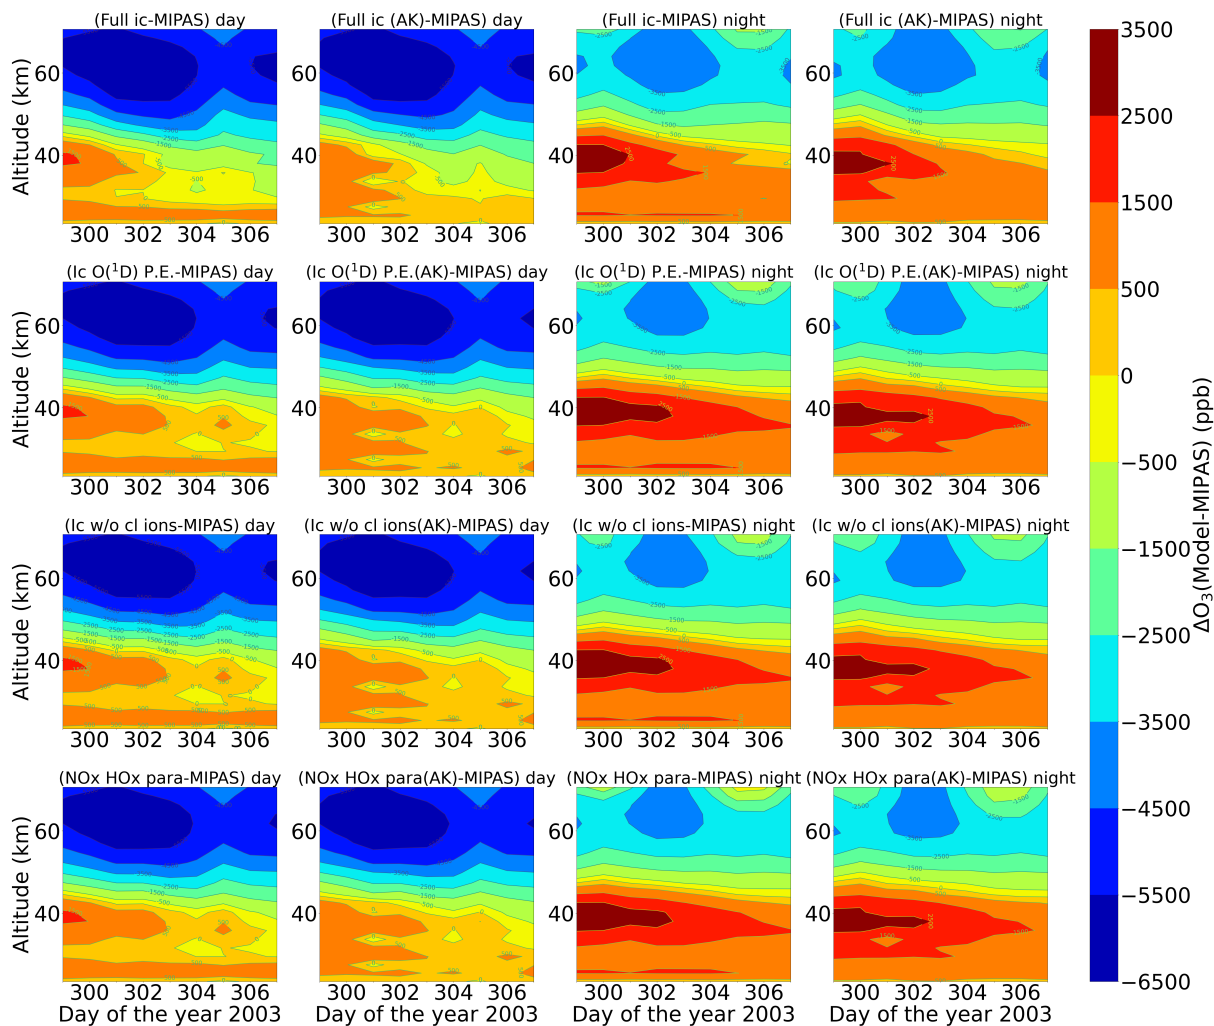

**Figure S7.** Same as figure S5 but for  $O_3$

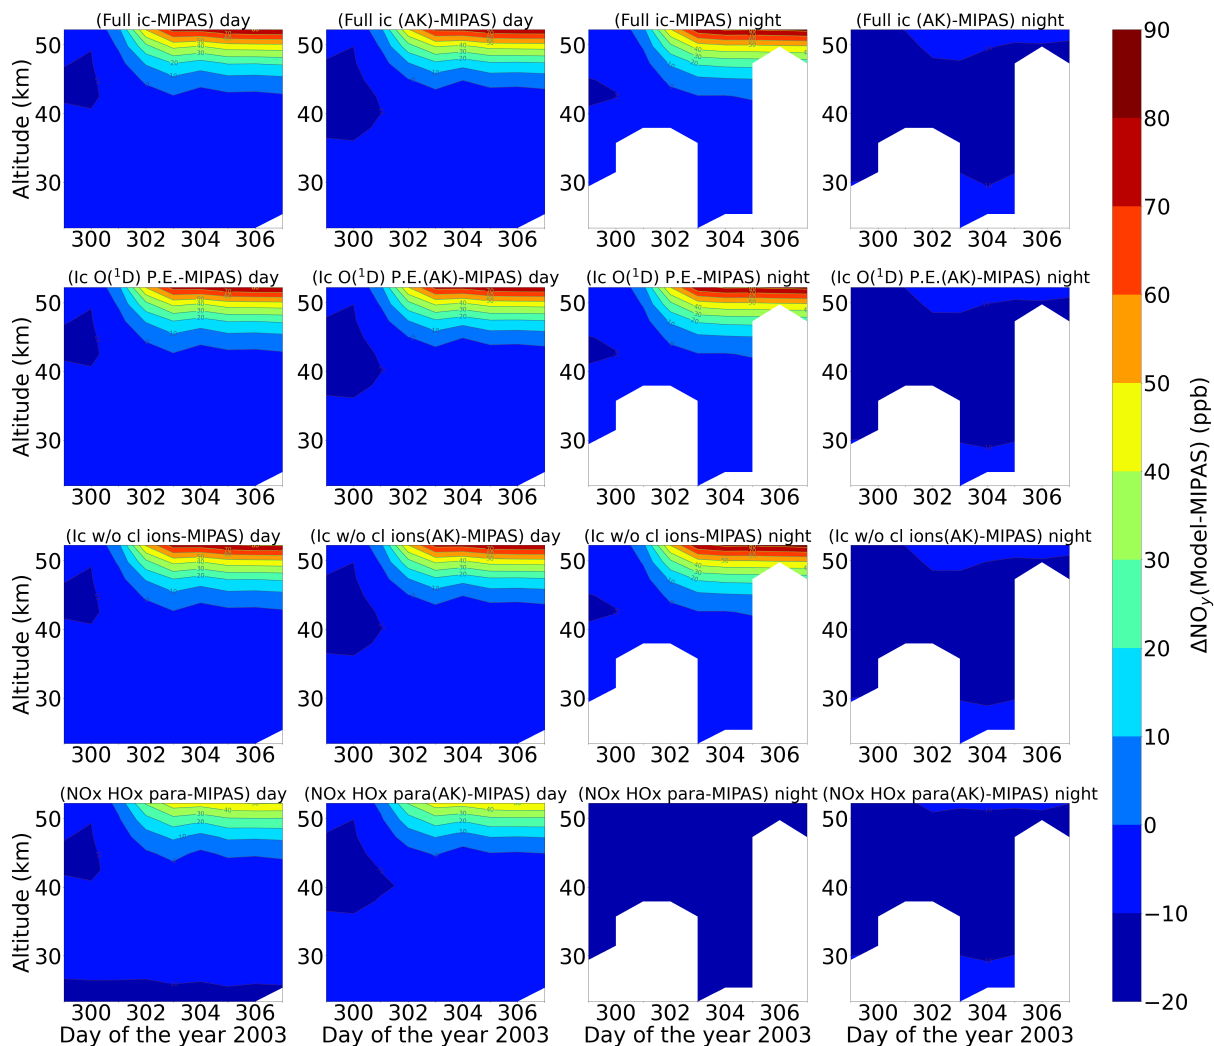

**Figure S8.** Same as figure S5 but for  $\text{NO}_y$

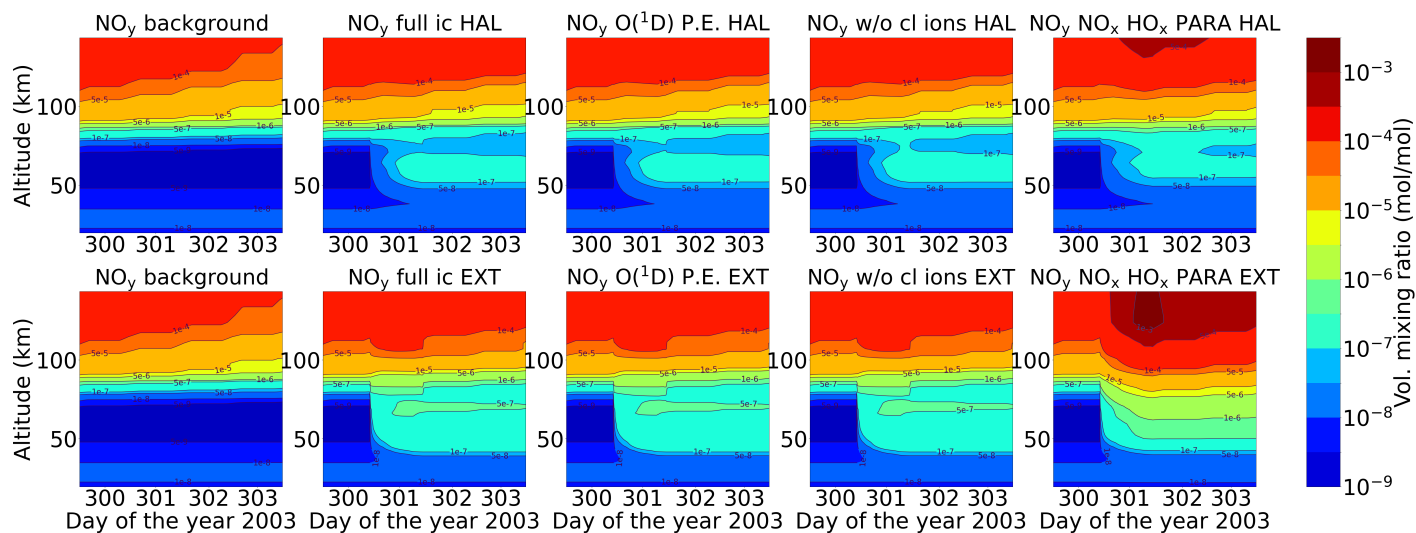

**Figure S9.** Comparison of the Halloween SPE and the extreme scenario (row-wise) for  $\tilde{\text{NO}}_y$  and column wise: reference run (background atmosphere), full ion-chemistry, full ion-chemistry with  $\text{O}(^1\text{D})$  set to photo-chemical equilibrium, without chlorine ions and parameterised  $\text{NO}_x$  and  $\text{HO}_x$  model for the high latitude of  $67.5^\circ\text{N}$ .

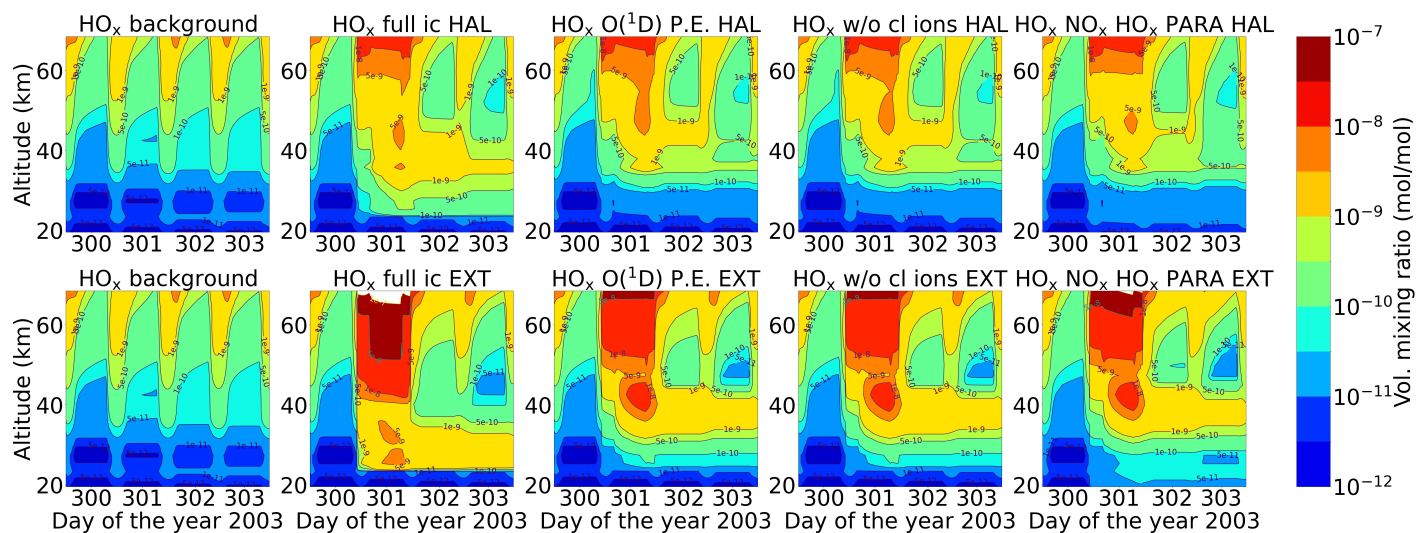

**Figure S10.** Same as figure S9 but for  $\text{HO}_x$ .

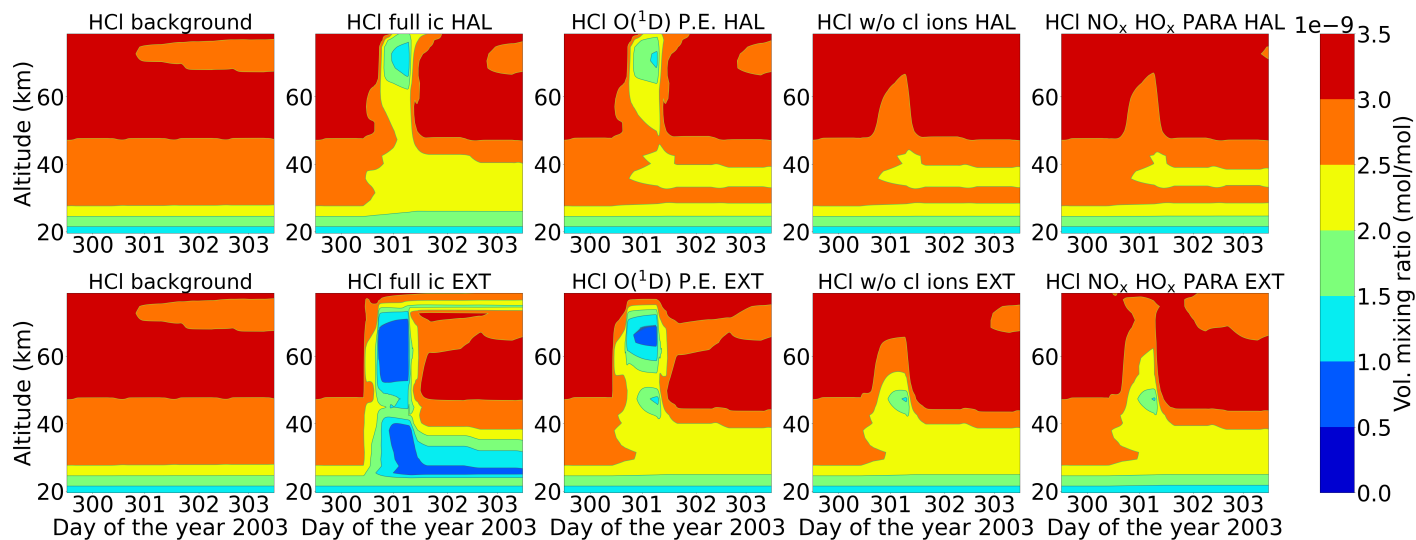

**Figure S11.** Same as figure S9 but for HCl

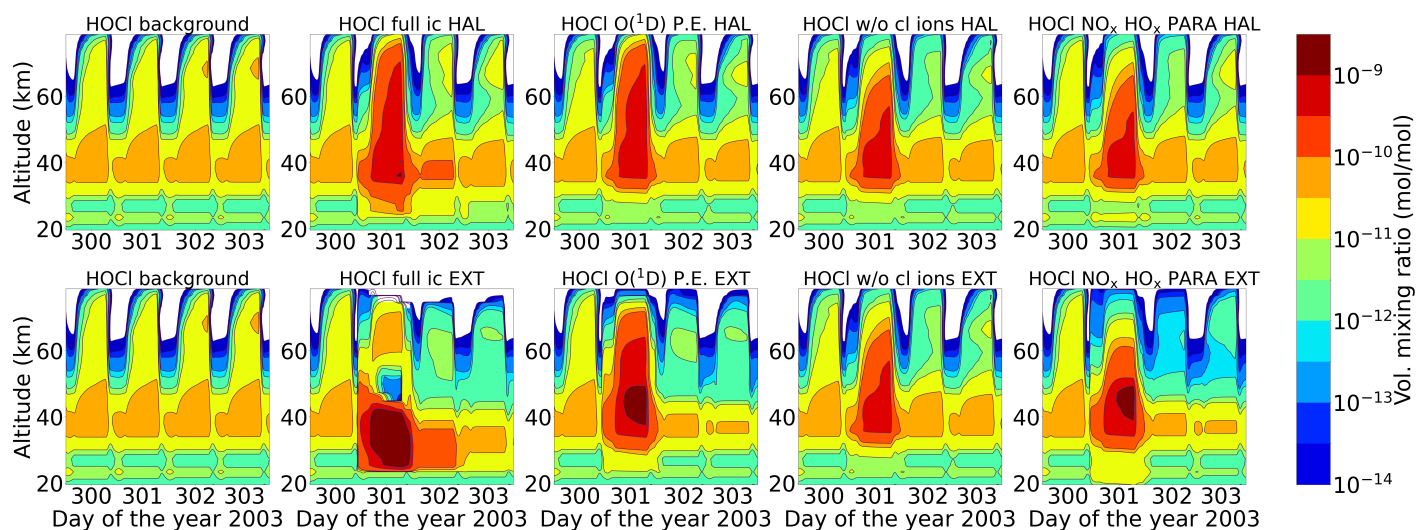

**Figure S12.** Same as figure S9 but for HOCl



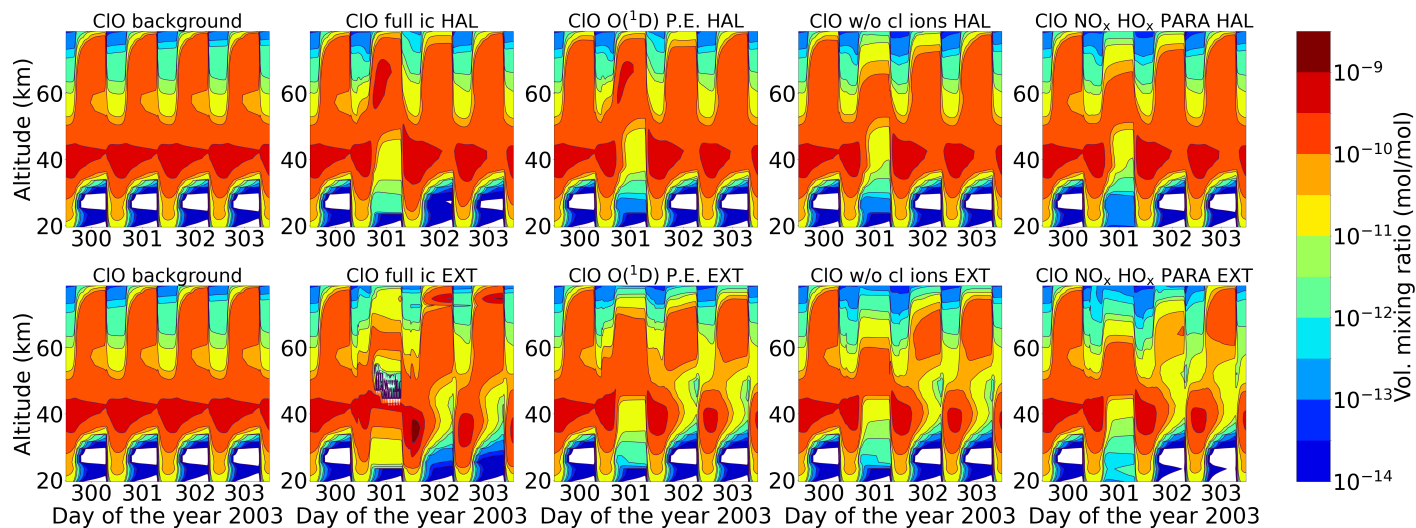

**Figure S13.** Same as figure S9 but for ClO

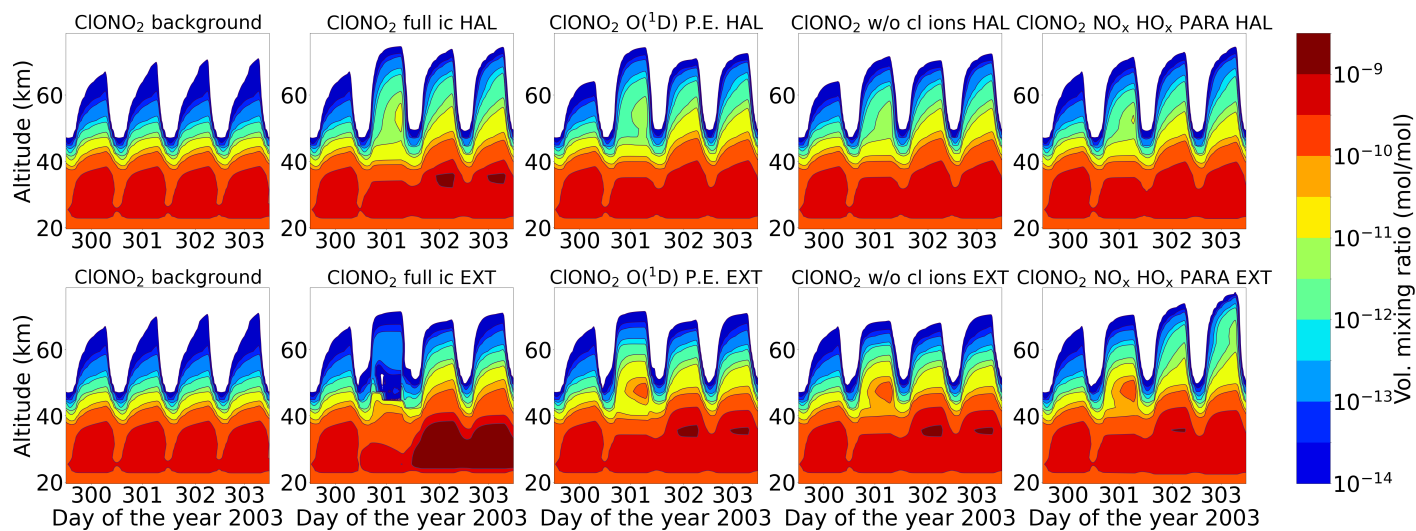

**Figure S14.** Same as figure S9 but for ClONO<sub>2</sub>

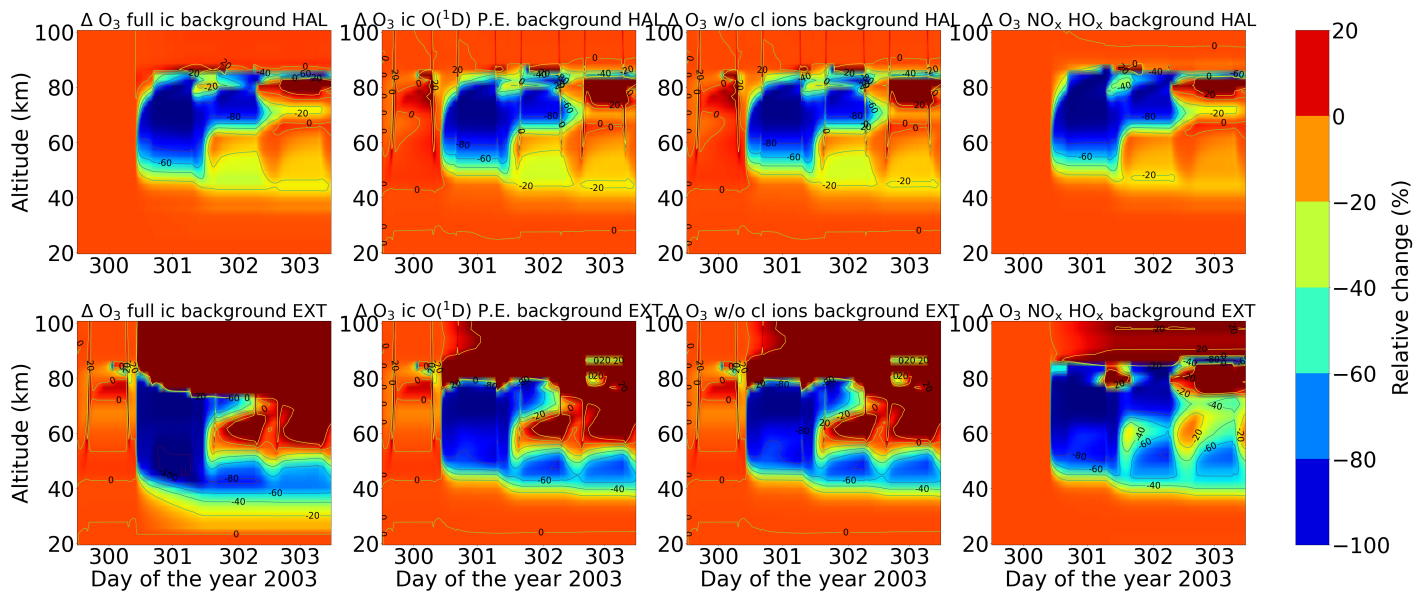

**Figure S15.** Same as figure S9 but for  $O_3$

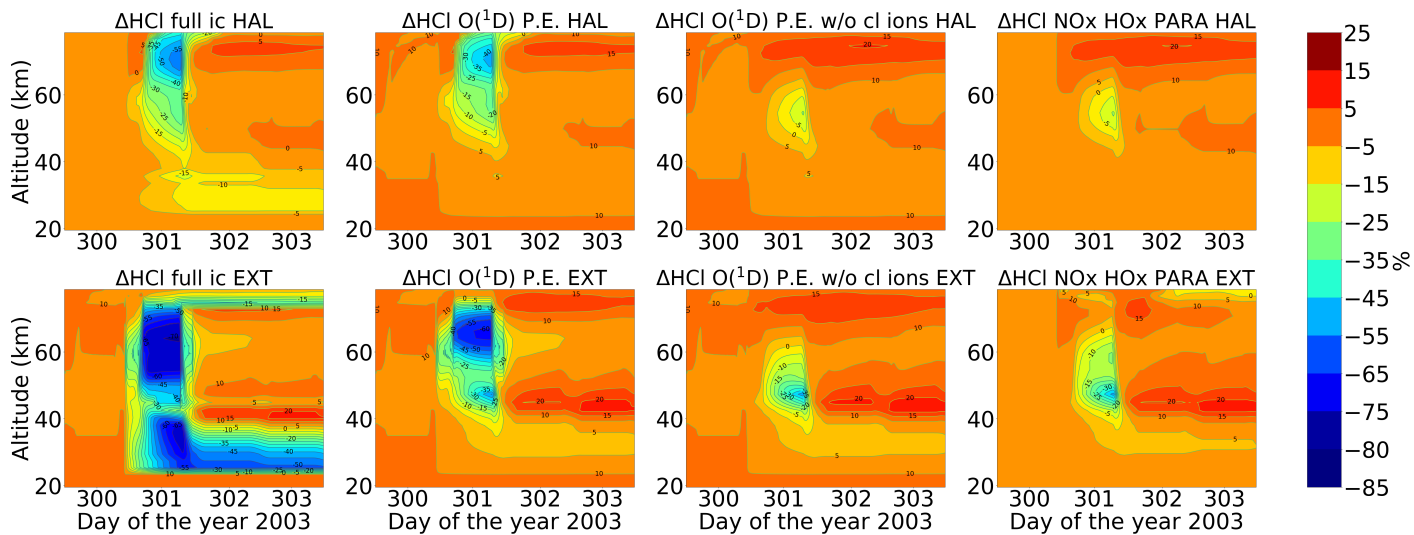

**Figure S16.** Relative change of the different sensitivity runs for HCl w.r.t. the reference run.

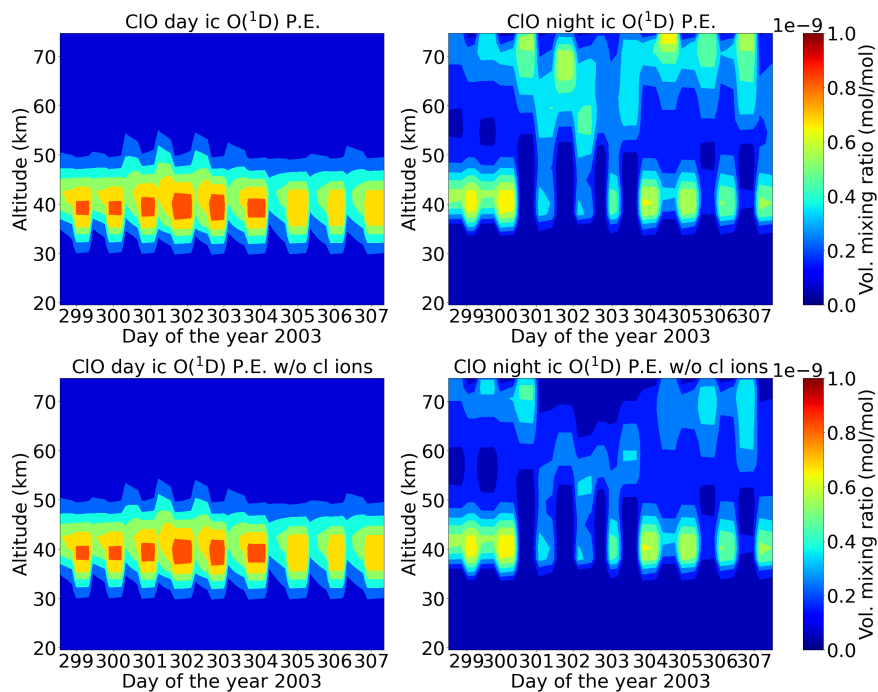

**Figure S17.** Diurnal cycle of ClO with temporal ionisation rates for the Halloween SPE for the sensitivity studies of ion-chemistry with  $O(^1D)$  in photo-chemical equilibrium and the one without chlorine ions.
